# Supplementary material for: Pathological Changes in the Lymphatic System of Patients with Secondary Lower Limb Lymphedema Based on Single Photon-Emission Computed Tomography/Computed Tomography/Lymphoscintigraphy Images
Source: PubMed Central journal article supplement — Lymphat Res Biol. 2022 Apr 20;20(2):144–52. doi: 10.1089/lrb.2021.0040 (PMC9081006; doi:10.1089/lrb.2021.0040), 2022-04-20
Supplement: Supp_TableS1.pdf [file Supp_TableS1.pdf]

## Supplementary Tables

Supplementary Table 1

| Dermal back flow type | Affected side legs |        |
|-----------------------|--------------------|--------|
|                       | LN (+)             | LN (-) |
| Type I                | 19                 | 6      |
| Type II               | 6                  | 2      |
| Type III              | 5                  | 5      |
| Type IV               | 2                  | 20     |
| Type V                | 0                  | 16     |
| <i>Total</i>          | 32                 | 49     |

**Supplementary Table 1.** Distribution of the patients with unilateral secondary lower limb lymphedema.

Each patient was classified into five types based on the location of dermal back flow and subcategorized into two groups according to the visualization of the lymph nodes in the inguinal region. Relevance was observed between the visualization of inguinal lymph nodes and the types of DBF ( $p=1.255E-09$ ; Fisher's exact test)

LN (+): lymph nodes were visualized in the single photon emission computed tomography-computed tomography lymphoscintigraphy (SPECT-CT LSG) images, LN (-): lymph nodes were absent in the SPECT-CT LSG images
