# Supplementary material for: Pathological Changes in the Lymphatic System of Patients with Secondary Lower Limb Lymphedema Based on Single Photon-Emission Computed Tomography/Computed Tomography/Lymphoscintigraphy Images
Source: PubMed Central journal article supplement — Lymphat Res Biol. 2022 Apr 20;20(2):144–52. doi: 10.1089/lrb.2021.0040 (PMC9081006; doi:10.1089/lrb.2021.0040), 2022-04-20
Supplement: Supp_TableS2.pdf [file Supp_TableS2.pdf]

Supplementary Table 2

| Unaffected side legs  |           |          |
|-----------------------|-----------|----------|
| Dermal back flow type | LN (+)    | LN (-)   |
| Type I                | 72        | 1        |
| Type II               | 2         | 0        |
| Type III              | 0         | 0        |
| Type IV               | 5         | 0        |
| Type V                | 1         | 0        |
| <i>Total</i>          | <i>80</i> | <i>1</i> |

**Supplementary Table 2.** Relevance between the lymph nodes in the inguinal region and the type of dermal back flow in the unaffected lower limb

LN (+): lymph nodes were visualized in the single photon emission computed tomography-computed tomography lymphoscintigraphy (SPECT-CT LSG) images, LN (-): lymph nodes were absent in the in the SPECT-CT LSG images
