# Supplementary material for: Pathological Changes in the Lymphatic System of Patients with Secondary Lower Limb Lymphedema Based on Single Photon-Emission Computed Tomography/Computed Tomography/Lymphoscintigraphy Images
Source: PubMed Central journal article supplement — Lymphat Res Biol. 2022 Apr 20;20(2):144–52. doi: 10.1089/lrb.2021.0040 (PMC9081006; doi:10.1089/lrb.2021.0040), 2022-04-20
Supplement: Supp_TableS3.pdf [file Supp_TableS3.pdf]

Supplementary Table 3

|           |        | Superficial dominant | Complex | Deep dominant |
|-----------|--------|----------------------|---------|---------------|
| Thigh     | LN (+) | 11                   | 10      | 11            |
|           | LN (-) | 5                    | 16      | 28            |
| Lower leg | LN (+) | 16                   | 7       | 9             |
|           | LN (-) | 16                   | 20      | 13            |

**Supplementary Table 3.** Association between the types of lymph flow pathway and the visualization of the inguinal lymph nodes in the affected lower limbs.

These two factors are not independent statistically in the thighs ( $p=2.07E-02$  Fisher`s exact test), while they are independent in the lower legs ( $p=1.772E-01$ ; Fisher`s exact test).

LN (+): lymph nodes were visualized in the SPECT-CT LSG images, LN (-): lymph nodes were absent in the in the SPECT-CT LSG images
