# Supplementary material for: Pathological Changes in the Lymphatic System of Patients with Secondary Lower Limb Lymphedema Based on Single Photon-Emission Computed Tomography/Computed Tomography/Lymphoscintigraphy Images
Source: PubMed Central journal article supplement — Lymphat Res Biol. 2022 Apr 20;20(2):144–52. doi: 10.1089/lrb.2021.0040 (PMC9081006; doi:10.1089/lrb.2021.0040), 2022-04-20
Supplement: Supp_TableS5.pdf [file Supp_TableS5.pdf]

Supplementary Table 5

| Thigh    |                      | Lower leg            |         |               |
|----------|----------------------|----------------------|---------|---------------|
|          |                      | superficial dominant | complex | deep dominant |
| Type I   | superficial dominant | 0                    | 0       | 0             |
|          | complex              | 2                    | 0       | 0             |
|          | deep dominant        | 0                    | 2       | 2             |
| Type II  | superficial dominant | 1                    | 0       | 0             |
|          | complex              | 1                    | 0       | 0             |
|          | deep dominant        | 0                    | 0       | 0             |
| Type III | superficial dominant | 2                    | 1       | 0             |
|          | complex              | 1                    | 1       | 0             |
|          | deep dominant        | 0                    | 0       | 0             |
| Type IV  | superficial dominant | 1                    | 0       | 0             |
|          | complex              | 5                    | 5       | 0             |
|          | deep dominant        | 2                    | 5       | 2             |
| Type V   | superficial dominant | 0                    | 0       | 0             |
|          | complex              | 0                    | 1       | 0             |
|          | deep dominant        | 1                    | 5       | 9             |

**Supplementary Table 5.** Distribution of the type I to V-DBF patients based on the lymph flow pathways in each body parts in cases whose lymph nodes in the inguinal region were negative in the images of SPECT-CT LSG in the affected lower limbs

DBF: dermal back flow.
