# Supplementary material for: Pathological Changes in the Lymphatic System of Patients with Secondary Lower Limb Lymphedema Based on Single Photon-Emission Computed Tomography/Computed Tomography/Lymphoscintigraphy Images
Source: PubMed Central journal article supplement — Lymphat Res Biol. 2022 Apr 20;20(2):144–52. doi: 10.1089/lrb.2021.0040 (PMC9081006; doi:10.1089/lrb.2021.0040), 2022-04-20
Supplement: Supp_TableS6.pdf [file Supp_TableS6.pdf]

Supplementary Table 6

|       |                      | Lower leg            |         |               |
|-------|----------------------|----------------------|---------|---------------|
|       |                      | Superficial dominant | Complex | Deep dominant |
|       | Superficial dominant | 0                    | 0       | 0             |
| Thigh | Complex              | 2                    | 1       | 0             |
|       | Deep dominant        | 0                    | 1       | 3             |

**Supplementary Table 6.** Distribution of the unaffected limbs of the patients whose affected limbs were classified into type I of dermal back flow type, and the lymph flow was regarded as deep pathway dominant both in the thigh and in the lower leg

These data are shown in Supplementary Figure S5 as a graph.
